# Supplementary material for: Immunohistochemical validation study of 15-gene biomarker panel predictive of benefit from adjuvant chemotherapy in resected non-small-cell lung cancer: analysis of JBR.10
Source: PubMed Central journal article supplement — ESMO Open. 2020 Mar 26;5(2):e000679. doi: 10.1136/esmoopen-2020-000679 (PMC7174014; doi:10.1136/esmoopen-2020-000679), 2020-03-26

Grieve *et al.*

### **Supplementary Figure Legends**

**Table S1: Correlation of genes scores in the SJRH cohort**

**Table S2: Association of biomarkers with clinicopathological parameters in the SJRH cohort.**

**Table S3: Prognostic significance of biomarkers in stage I-III patients in the SJRH cohort**

**Table S4: Correlation between mRNA-protein in the JBR.10 cohort**

**Figure S1: IHC staining of biomarkers on the SJRH TMAs.** Representative images demonstrating low and high nuclear staining of HEXIM1 (a, b), cytoplasmic staining of UMPS (c, d), and cytoplasmic staining of FAM64A (e, f), respectively.

**Figure S2: Prognostic evaluation of individual biomarkers in SJRH cohort.** The OS and RFS curves according to HEXIM1 (a, b), UMPS (c, d), and FAM64A (e, f), respectively.

**Table S1:** Correlation of gene scores in the SJRH cohort

|        | FOSL2 | ATP1B1                                       | STMN2                                      | TRIM14                                     | HEXIM1                                     | UMPS                                       | FAM64A                                       |
|--------|-------|----------------------------------------------|--------------------------------------------|--------------------------------------------|--------------------------------------------|--------------------------------------------|----------------------------------------------|
| FOSL2  |       | <b>-0.32</b><br>( <i>p</i> < <b>0.0001</b> ) | <b>0.23</b><br>( <i>p</i> = <b>0.003</b> ) | -0.11<br>( <i>p</i> =0.301)                | <b>0.19</b><br>( <i>p</i> = <b>0.017</b> ) | 0.06<br>( <i>p</i> =0.417)                 | 0.01<br>( <i>p</i> =0.943)                   |
| ATP1B1 |       |                                              | -0.1<br>( <i>p</i> =0.216)                 | 0.03<br>( <i>p</i> =0.749)                 | -0.06<br>( <i>p</i> =0.469)                | -0.09<br>( <i>p</i> =0.245)                | <b>0.16</b><br>( <i>p</i> = <b>0.034</b> )   |
| STMN2  |       |                                              |                                            | <b>0.31</b><br>( <i>p</i> = <b>0.003</b> ) | 0.13<br>( <i>p</i> =0.093)                 | <b>0.19</b><br>( <i>p</i> = <b>0.014</b> ) | <b>0.185</b><br>( <i>p</i> = <b>0.017</b> )  |
| TRIM14 |       |                                              |                                            |                                            | 0.11<br>( <i>p</i> =0.285)                 | <b>0.30</b><br>( <i>p</i> = <b>0.004</b> ) | 0.18<br>( <i>p</i> =0.091)                   |
| HEXIM1 |       |                                              |                                            |                                            |                                            | 0.061<br>( <i>p</i> =0.432)                | 0.087<br>( <i>p</i> =0.258)                  |
| UMPS   |       |                                              |                                            |                                            |                                            |                                            | <b>0.265</b><br>( <i>p</i> = <b>0.0005</b> ) |
| FAM64A |       |                                              |                                            |                                            |                                            |                                            |                                              |

**Table S2: Association of biomarkers with clinicopathological parameters in the SJRH cohort**

| Characteristics | HEXIM1         |                |         | UMPS            |               |         | FAM64A          |               |         |
|-----------------|----------------|----------------|---------|-----------------|---------------|---------|-----------------|---------------|---------|
|                 | High<br>(n=44) | Low<br>(n=129) | p-value | High<br>(n=123) | Low<br>(n=47) | p-value | High<br>(n=143) | Low<br>(n=27) | p-value |
| Age             |                |                | 0.71    |                 |               | 0.58    |                 |               | 1       |
| <61             | 12 (27.3%)     | 41 (31.8%)     |         | 40 (32.5%)      | 13 (27.7%)    |         | 46 (32.2%)      | 8 (29.6%)     |         |
| ≥61             | 32 (72.7%)     | 88 (68.2%)     |         | 83 (67.5%)      | 34 (72.3%)    |         | 97 (67.8%)      | 19 (70.4%)    |         |
| Sex             |                |                | 0.6     |                 |               | 0.12    |                 |               | 0.09    |
| Male            | 21 (47.7%)     | 68 (52.7%)     |         | 59 (48.0%)      | 29 (61.7%)    |         | 67 (46.9%)      | 18 (66.7%)    |         |
| Female          | 23 (52.3%)     | 61 (47.3%)     |         | 64 (52.0%)      | 18 (38.3%)    |         | 76 (53.1%)      | 9 (33.3%)     |         |
| TNM stage       |                |                | 0.11    |                 |               | 0.9     |                 |               | 0.26    |
| I               | 31 (70.5%)     | 77 (59.7%)     |         | 76 (61.8%)      | 30 (63.8%)    |         | 88 (61.5%)      | 17 (63.0%)    |         |
| II              | 11 (25.0%)     | 30 (23.3%)     |         | 30 (24.4%)      | 10 (21.3%)    |         | 34 (23.8%)      | 7 (25.9%)     |         |
| III             | 2 (4.5%)       | 22 (17.0%)     |         | 17 (13.8%)      | 7 (14.9%)     |         | 21 (14.7%)      | 3 (11.1%)     |         |
| Histology       |                |                | 0.638   |                 |               | 0.72    |                 |               | 0.16    |
| Adeno           | 23 (52.3%)     | 66 (51.2%)     |         | 61 (49.6%)      | 25 (53.2%)    |         | 75 (52.4%)      | 12 (44.4%)    |         |
| SCC             | 16 (36.4%)     | 41 (31.8%)     |         | 40 (32.5%)      | 16 (34.0%)    |         | 44 (30.8%)      | 13 (48.2%)    |         |
| Other           | 5 (11.3%)      | 22 (17.0%)     |         | 22 (17.9%)      | 6 (12.8%)     |         | 24 (16.8%)      | 2 (7.4%)      |         |
| Type of Surgery |                |                | 0.1     |                 |               | 0.18    |                 |               | 0.22    |
| Pneumectomy     | 6 (13.6%)      | 7 (5.4%)       |         | 11 (8.9%)       | 1 (2.1%)      |         | 12 (8.4%)       | 0 (0%)        |         |
| Lesser surgery  | 38 (86.4%)     | 122 (94.6%)    |         | 112 (91.9%)     | 46 (97.9%)    |         | 131 (91.6%)     | 27 (100%)     |         |
| Chemotherapy    |                |                | 0.44    |                 |               | 0.28    |                 |               | 0.87    |
| Post            | 11 (25.0%)     | 44 (34.1%)     |         | 41 (33.3%)      | 13 (27.7%)    |         | 45 (31.5%)      | 9 (33.3%)     |         |
| None            | 31 (70.5%)     | 77 (59.7%)     |         | 73 (59.3%)      | 33 (70.2%)    |         | 89 (62.2%)      | 17 (63.0%)    |         |
| Other           | 2 (4.5%)       | 8 (6.2%)       |         | 9 (7.4%)        | 1 (2.1%)      |         | 9 (6.3%)        | 1 (3.7%)      |         |
| KRAS Mutation   |                |                | 0.57    |                 |               | 0.71    |                 |               | 0.25    |
| Present         | 14 (31.8%)     | 35 (27.1%)     |         | 37 (30.1%)      | 12 (25.5%)    |         | 43 (30.1%)      | 5 (18.5%)     |         |
| Absent          | 30 (68.2%)     | 94 (72.9%)     |         | 86 (69.9%)      | 35 (74.5%)    |         | 100 (69.9%)     | 22 (81.5%)    |         |

Abbreviation: Adeno, adenocarcinoma; SCC, squamous cell carcinoma

**Table S3:** Prognostic significance of biomarkers in SJRH cohort

| Biomarker | OS               |                 | RFS              |                 |
|-----------|------------------|-----------------|------------------|-----------------|
|           | HR (CI)          | <i>p</i> -value | HR (CI)          | <i>p</i> -value |
| FOSL2     | 0.50 (0.30-0.84) | 0.0089          | 0.56 (0.35-0.91) | 0.0184          |
| ATP1B1    | 0.66 (0.39-1.14) | 0.138           | 0.66 (0.38-1.12) | 0.1216          |
| STMN2     | 1.35 (0.85-2.14) | 0.2004          | 1.53 (1.00-2.33) | 0.0493          |
| TRIM14    | 1.18 (0.63-2.22) | 0.6045          | 1.07 (0.61-1.91) | 0.8269          |
| HEXIM1    | 0.72 (0.45-1.16) | 0.1787          | 0.81 (0.53-1.25) | 0.3454          |
| UMPS      | 0.52 (0.31-0.86) | 0.0109          | 0.62 (0.39-0.99) | 0.0439          |
| FAM64A    | 0.90 (0.49-1.66) | 0.7381          | 1.16 (0.67-2.01) | 0.6022          |

Abbreviations: CI, 95% confidence interval; HR, hazard ratio; OS, overall survival; RFS, recurrence-free survival

**Table S4: Correlation between mRNA-protein in JBR.10 cohort**

|                | Correlation coefficient | (p-value)     |
|----------------|-------------------------|---------------|
| FOSL2 (n=126)  | 0.1012                  | 0.2594        |
| ATP1B1 (n=126) | 0.2064                  | <b>0.0226</b> |
| STMN2 (n=126)  | -0.0191                 | 0.8315        |
| TRIM14 (n=117) | 0.0549                  | 0.5583        |

Figure S1

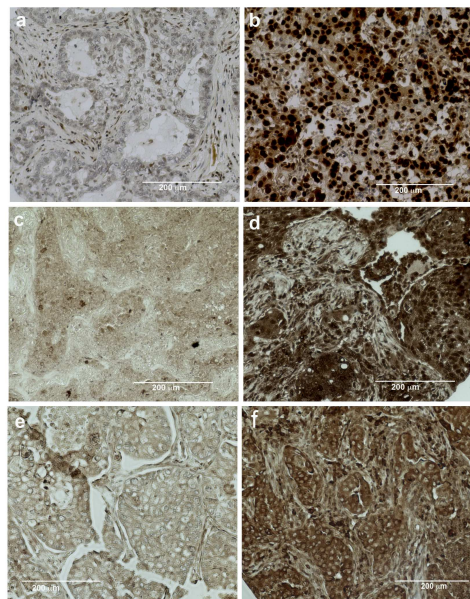

Figure S2

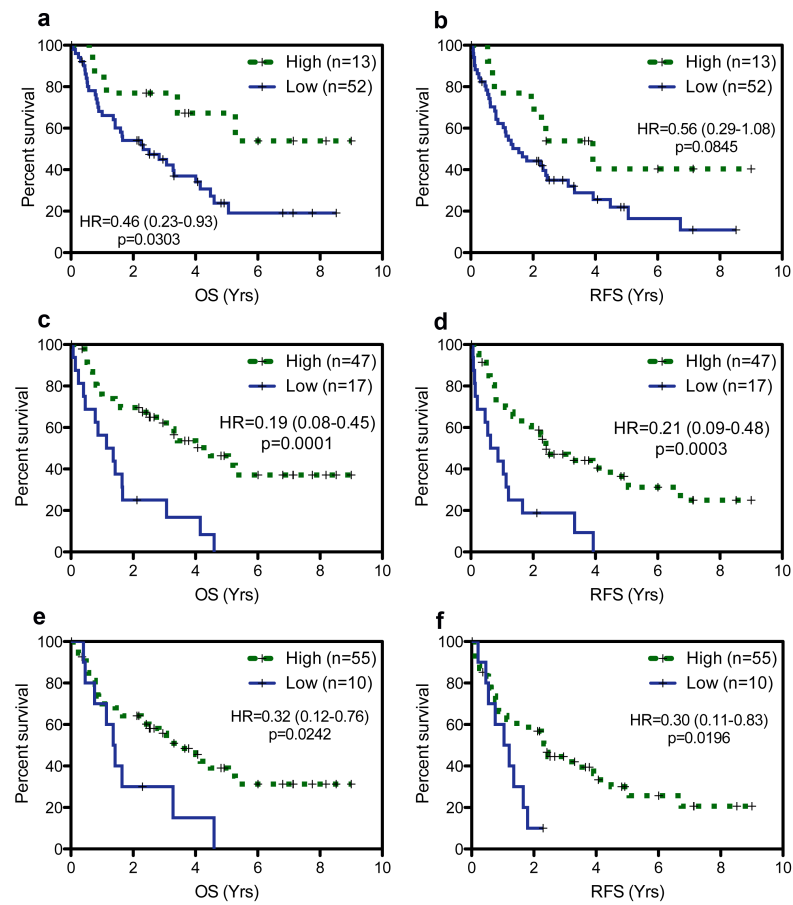

Supplement: esmoopen-2020-000679supp001.pdf [file esmoopen-2020-000679supp001.pdf]
